# Supplementary material for: Timing of spring events changes under modelled future climate scenarios in a mesotrophic lake
Source: Copernicus journal article supplement (doi:10.5194/egusphere-2023-1679), 2023-09-25
Supplement: Supplementary file 1 [file egusphere-2023-1679-supplement.pdf]

## S1. Model performance time series

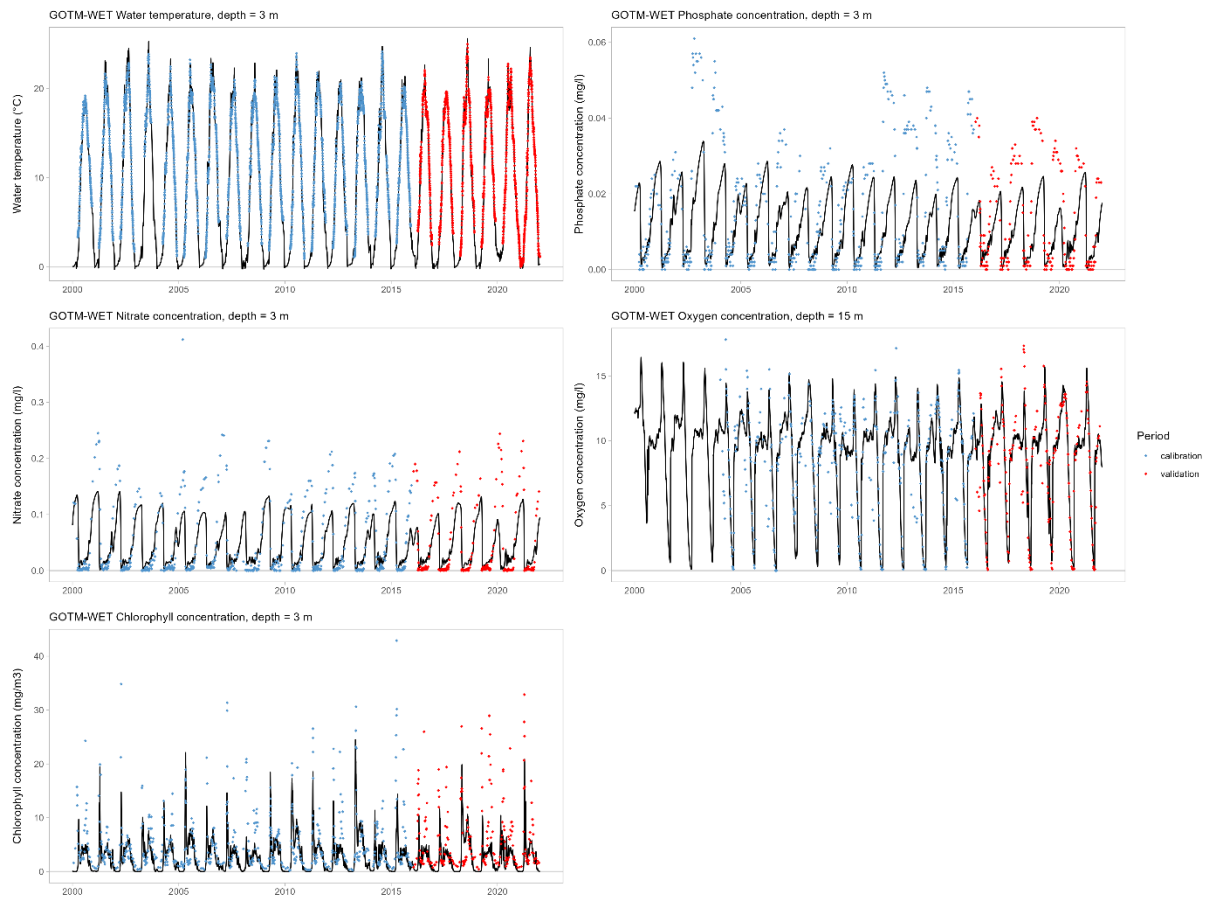

Figure S1. Time series of modelled (black line) and observed (blue dots for calibration, red dots for validation period) GOTM-WET variables.

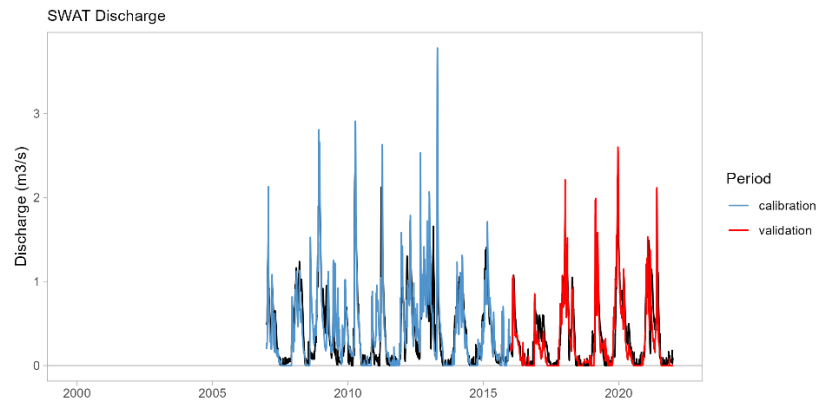

Figure S2. Time series of modelled (black line) and observed (blue line for calibration, red line for validation period) discharge.

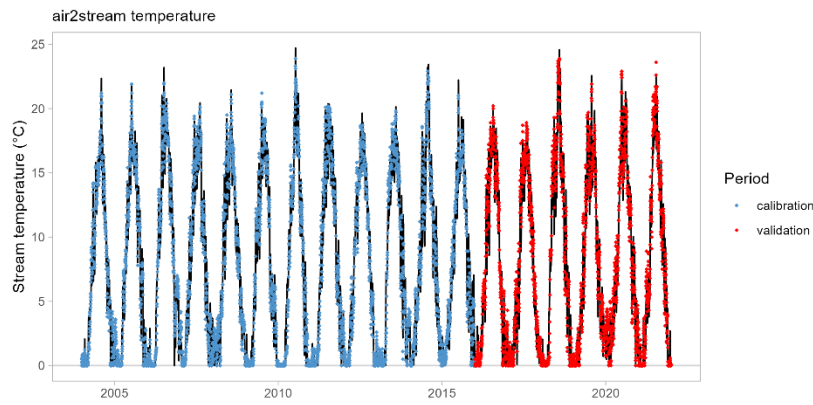

Figure S3. Time series of modelled (black line) and observed (blue dots for calibration, red dots for validation period) stream temperature.

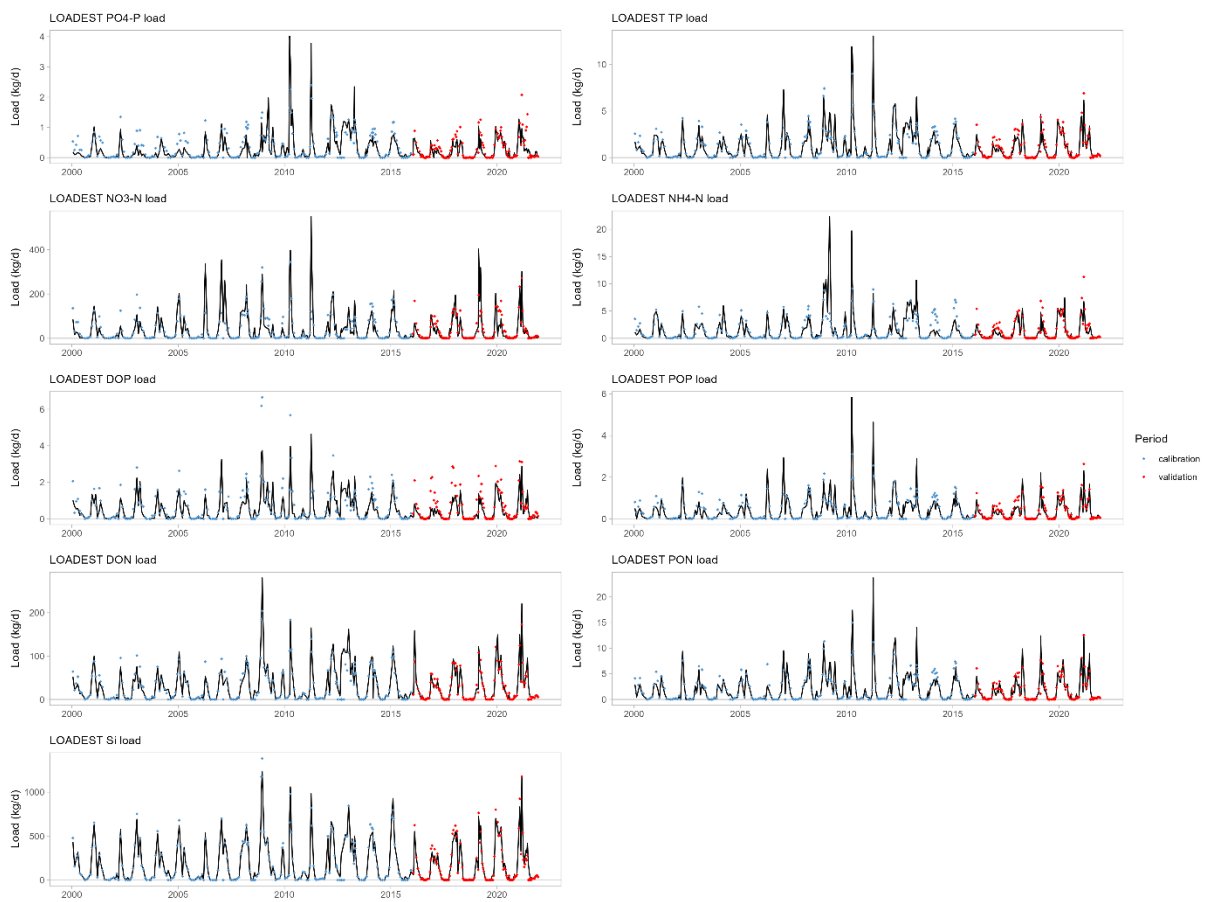

Figure S4. Time series of modelled (black line) and observed (blue dots for calibration, red dots for validation period) nutrient loads. Nutrient concentrations were simulated with LOADEST statistical models and both the observed and simulated concentrations were fitted to simulated discharges.

## S2. Investigation of events with an error larger than 14 days

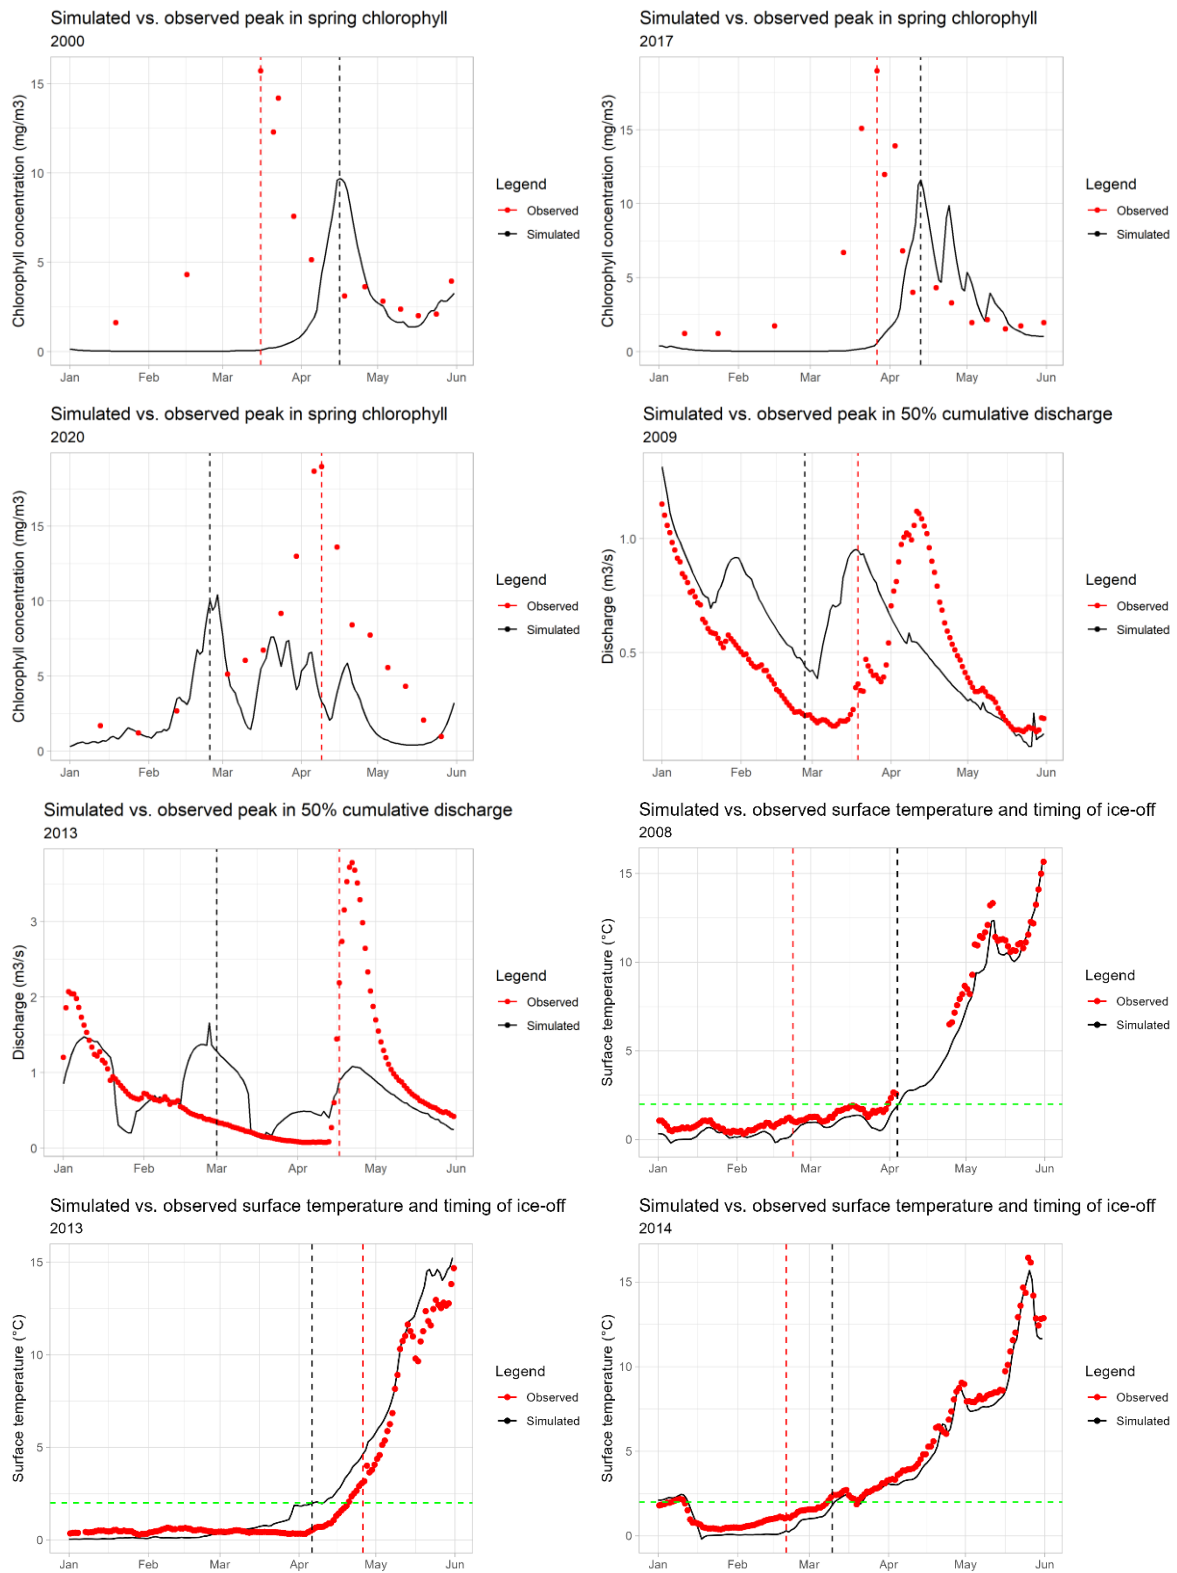

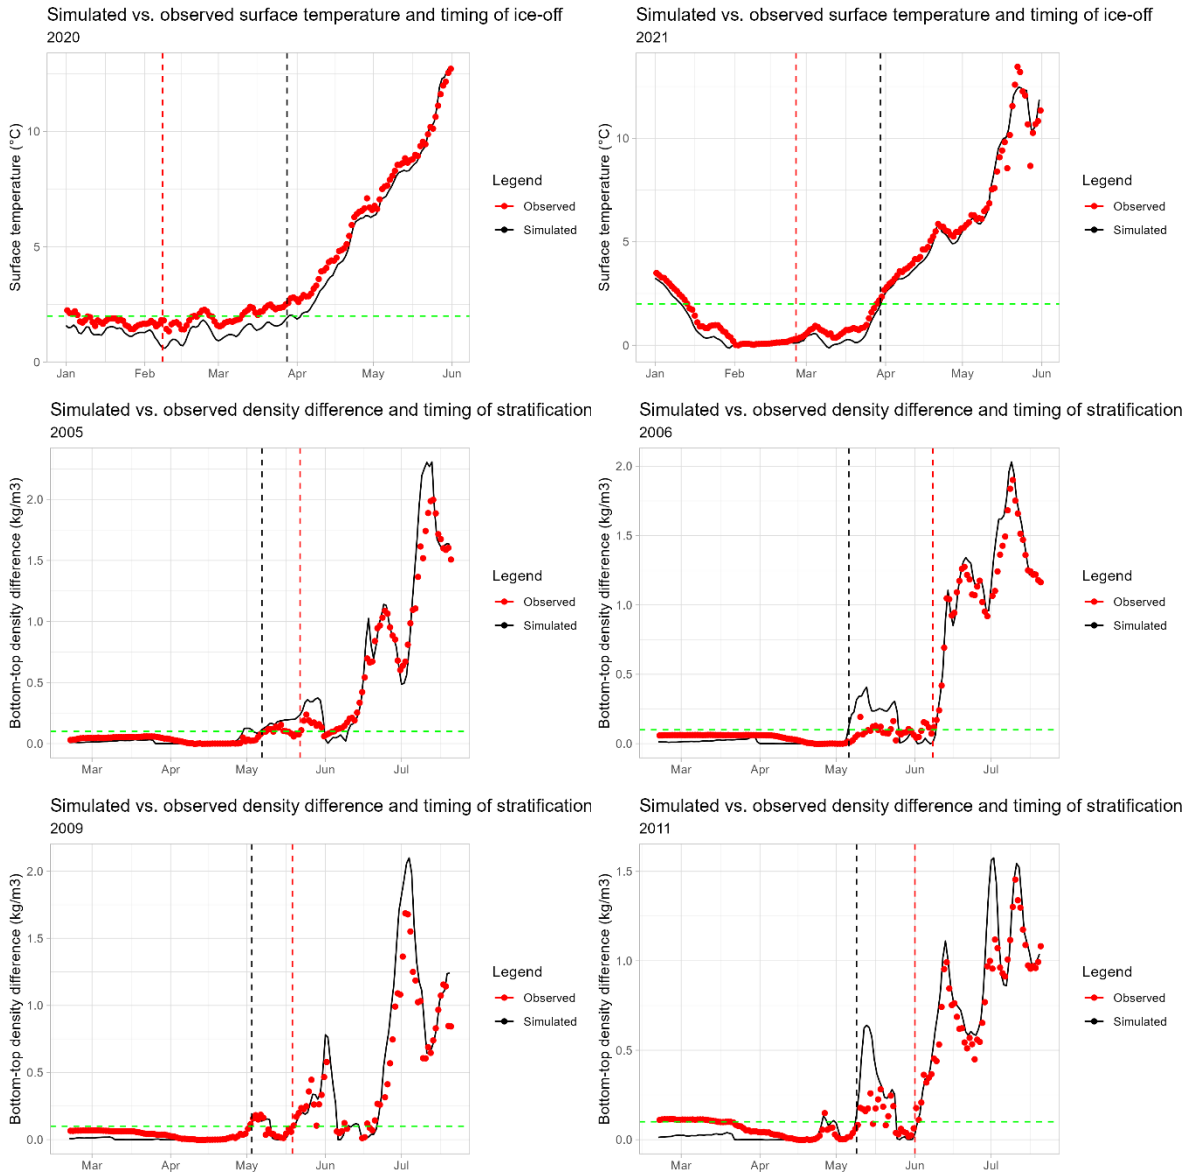

Figure S5. Plots of simulated (black line) and observed (red dots) values related to the peak in chlorophyll, date of ice-off, date of 50% cumulative spring discharge, and onset of stratification, where error values exceeded 14 days. Vertical dashed lines indicated the timing calculated for the simulations (black) and observations (red). A horizontal green line is plotted to denote the threshold values for simulated timing of ice-off (2 °C) and density-difference for onset of stratification (0.1 kg/m<sup>3</sup>).

Table S1. Reason for bad fit for each of the events plotted in Figure S5. “Model failure” indicates that the model did not capture the dynamics of the lake. “Method failure” indicated that the method to identify the peak was the main cause of the discrepancy between model and observations, rather than the inability of the model to capture in-lake dynamics.

| <b>Year</b> | <b>Event</b>         | <b>Reason for bad fit</b>                                                                                                                                                                                                                                                                                     |
|-------------|----------------------|---------------------------------------------------------------------------------------------------------------------------------------------------------------------------------------------------------------------------------------------------------------------------------------------------------------|
| 2000        | Chlorophyll peak     | Model failure. Perhaps related to a short spin-up period                                                                                                                                                                                                                                                      |
| 2017        | Chlorophyll peak     | Model failure                                                                                                                                                                                                                                                                                                 |
| 2020        | Chlorophyll peak     | Either model failure or a gap in observations missed the real first spring peak. Observations before and after the simulated peak are in line with the simulation, but there is an observation gap of 20 days, in which the model simulated a peak in chlorophyll, which cannot be confirmed by measurements. |
| 2009        | Discharge peak       | Model failure                                                                                                                                                                                                                                                                                                 |
| 2013        | Discharge peak       | Model failure                                                                                                                                                                                                                                                                                                 |
| 2008        | Ice-off              | Method failure                                                                                                                                                                                                                                                                                                |
| 2013        | Ice-off              | Model failure and method failure                                                                                                                                                                                                                                                                              |
| 2014        | Ice-off              | Method failure                                                                                                                                                                                                                                                                                                |
| 2020        | Ice-off              | Method failure                                                                                                                                                                                                                                                                                                |
| 2021        | Ice-off              | Method failure                                                                                                                                                                                                                                                                                                |
| 2005        | Stratification onset | Method failure. A temporary stratification event lasted slightly longer than 7 days in the simulation and slightly shorter in the observations, causing a mismatch. The start of the permanent stratification period was simulated well.                                                                      |
| 2006        | Stratification onset | Same as above                                                                                                                                                                                                                                                                                                 |
| 2009        | Stratification onset | Same as above                                                                                                                                                                                                                                                                                                 |
| 2011        | Stratification onset | Same as above                                                                                                                                                                                                                                                                                                 |

### S3. Mann-Kendall test results for the relative comparisons

Table S2. Results of Mann-Kendall trend tests for relative trends of the timing of spring events during the future climate scenarios.

| Variable             | Relative to          | SSP  | p-value              | Sen's slope (days/decade) | Intercept (days) |
|----------------------|----------------------|------|----------------------|---------------------------|------------------|
| 50% spring discharge | Chlorophyll peak     | 2-45 | 0.994                | 0                         | -27.40           |
| Ice-off              | Chlorophyll peak     | 2-45 | 0.555                | 0.3                       | -4.58            |
| 50% spring discharge | Ice-off              | 2-45 | 0.766                | -0.12                     | -24.90           |
| Chlorophyll peak     | Stratification onset | 2-45 | 0.001                | -1.23                     | -31.26           |
| 50% spring discharge | Stratification onset | 2-45 | $4.8 \cdot 10^{-4}$  | -1.07                     | -62.99           |
| Ice-off              | Stratification onset | 2-45 | $5.6 \cdot 10^{-6}$  | -0.94                     | -34.57           |
| 50% spring discharge | Chlorophyll peak     | 5-85 | $3.7 \cdot 10^{-4}$  | 1.12                      | -33.51           |
| Ice-off              | Chlorophyll peak     | 5-85 | 0.388                | -0.21                     | -5.18            |
| 50% spring discharge | Ice-off              | 5-85 | $3.6 \cdot 10^{-4}$  | 1.44                      | -31.35           |
| Chlorophyll peak     | Stratification onset | 5-85 | $2.0 \cdot 10^{-10}$ | -1.87                     | -31.36           |
| 50% spring discharge | Stratification onset | 5-85 | 0.103                | -0.58                     | -66.66           |
| Ice-off              | Stratification onset | 5-85 | $3.4 \cdot 10^{-15}$ | -2.00                     | -33.20           |

#### S4. Surface water temperature, nitrate, and phosphate concentrations, underwater shortwave radiation during the spring chlorophyll peak

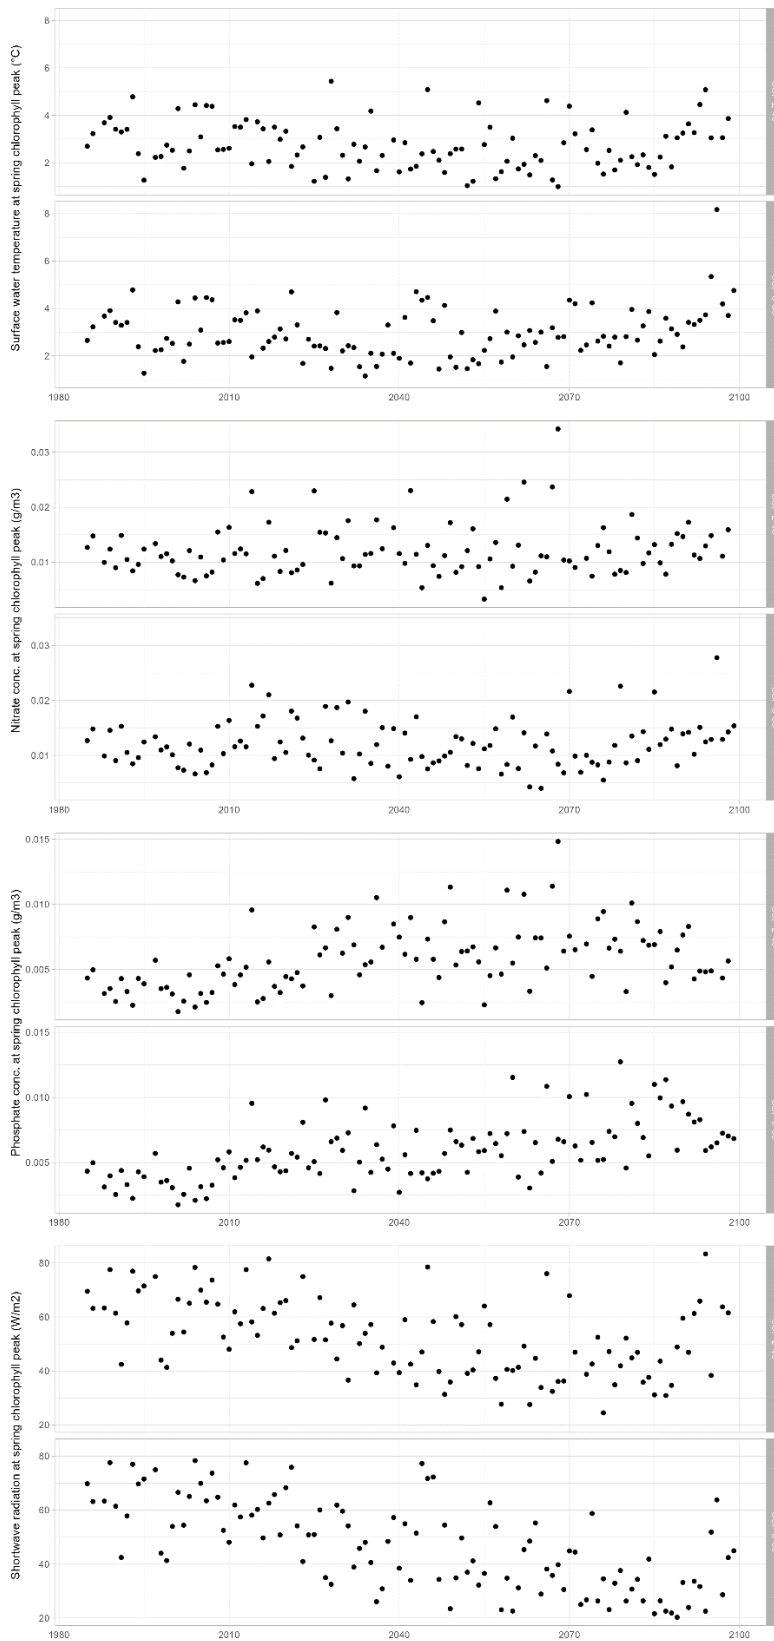

Figure S6. Surface water temperature, nitrate concentration, phosphate concentration, and underwater shortwave radiation (top to bottom) at 0.5 m depth during the spring chlorophyll peak, averaged over all GCMs, for both SSP 2-45 and SSP 5-85.

## S5. Zooplankton dynamics

The zooplankton simulations could not be compared to detailed field data and the concentrations simulated by the model are unlikely to be in line with observations, as also predators of zooplankton (e.g. fish) were absent in the simulations. Although zooplankton grazing on phytoplankton is indeed likely to occur throughout the year, especially the summer zooplankton concentrations would be strongly suppressed by fish predation in Lake Erken. These results are shown primarily as supporting information for how they may have influenced the simulated phytoplankton dynamics.

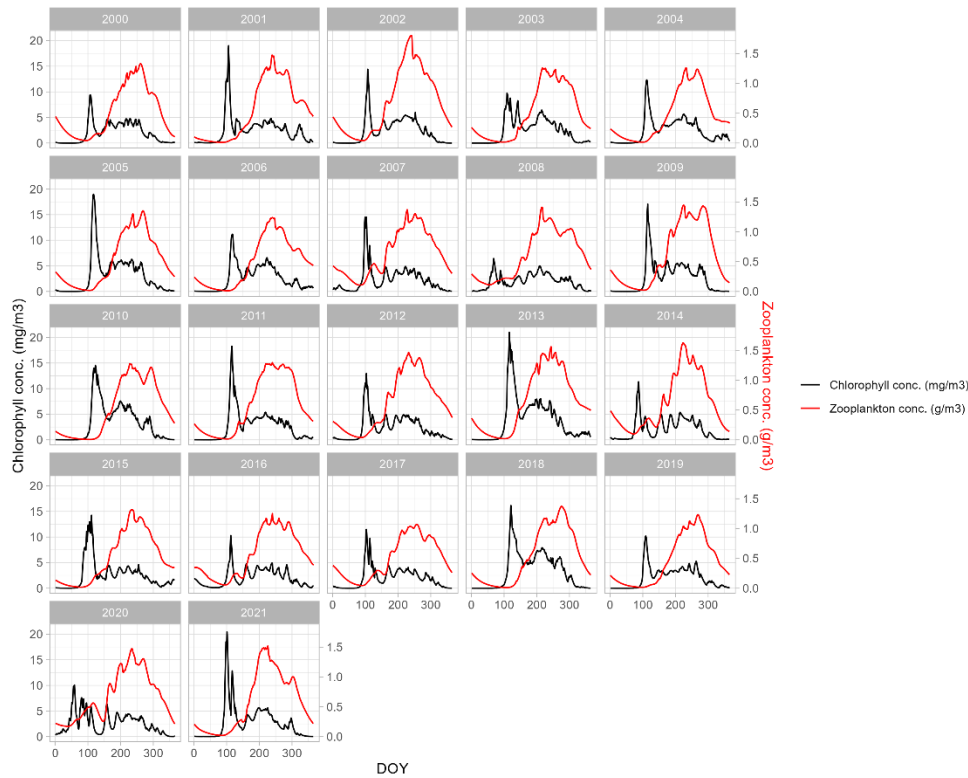

Figure S7. Chlorophyll (black line, left y-axis) and zooplankton concentration (red line, right y-axis) per day-of-the-year (DOY), for every year in the calibration run. Simulated concentrations at 0.5 m depth are shown.

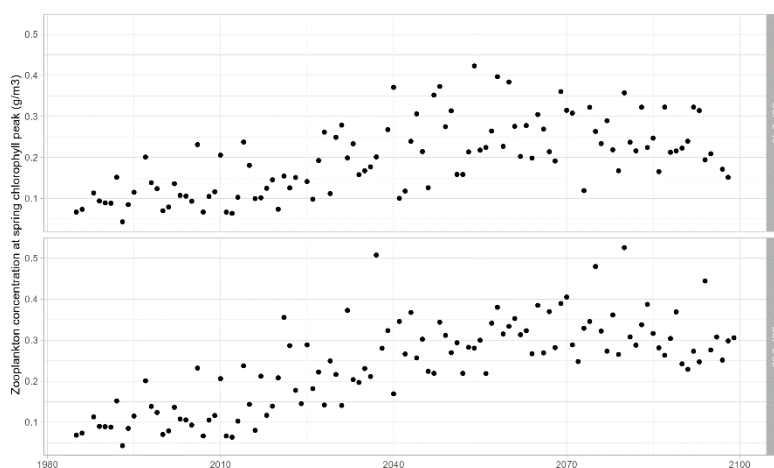

Figure S8. Zooplankton concentration at 0.5 m depth during the spring chlorophyll peak, averaged over all GCMs, for both SSP 2-45 and SSP 5-85 (top and bottom panel, respectively).
